# Supplementary material for: Succinic acid-assisted stability enhancement of a colloidal organometal halide perovskite and its application as a fluorescent keypad lock
Source: Royal Society of Chemistry journal article supplement (doi:10.1039/c8nj06487c), 2019-01-01
Supplement: c8nj06487c1.pdf [file c8nj06487c1.pdf]

## Supplymentary Information

### **Succinic acid assisted stability enhancement of colloidal organometal halide perovskite and its application as a fluorescent keypad lock**

Parul Bansal<sup>[a]</sup> and Prasenjit Kar<sup>\*[a]</sup>

a- Department of Chemistry, Indian Institute of Technology Roorkee, Roorkee, Uttarakhand 247667, India.

Corresponding Email Address : kar.prasen@gmail.com,

## Contents

### 1. Material characterization

Figure S1. FT-IR spectra of MAPbBr<sub>3</sub> solution

Table S1 summarizes solved Powder XRD pattern for MAPbBr<sub>3</sub> Perovskite solution

Figure S2 shows TEM images in different scales at 200kV

Figure S3 Degraded TEM image after 25 minutes

Figure S4 shows TEM image of MAPbBr<sub>3</sub> using Oleic and oleylamine (100/200μl) in CHCl<sub>3</sub>

Figure S5 FE SEM (Carl Zeiss) images for MAPbBr<sub>3</sub> solution (using succinic acid) in CHCl<sub>3</sub> and Toluene

Figure S6 Relative PL intensity versus amount of water.

Figure S7 Quenching of MAPbBr<sub>3</sub> solution (synthesized using oleic acid )in small amount of water

Figure S8 shows shifted time dependent PL studies of perovskite solution in the presence of 400μL of water

Figure S9 shows decreasing relative PL intensity and degradation of perovskite solution in 150 minutes in the presence of water

Figure S10 refilling of pen and application as fluorescent ink

## **1. Material characterization**

### **1.1 UV Vis Absorption Spectroscopy and Photoluminescence Spectroscopy**

Shimadzu UV-Vis 2450 spectrophotometer was used for recording UV-Vis absorption spectra in the range of 200-650 nm. Photoluminescence spectra were taken by Horiba scientific Fluoromax-4C spectrophotometer. A quartz cuvette of 10 mm path length and volume 3 ml was used for collecting the spectra.

**1.2. TCSPC studies** Fluorescence lifetime decay measurements were recorded on 1cm quartz cell on a Horiba Jobin Yvon , " Fluorocube Fluorescence Lifetime System" equipped with NanoLEDs and LDs as the excitation source and an automated polarization accessory (Model 5000 U-02).

**1.3 Fourier Transform Infrared Spectroscopy (FTIR)** Infra red spectra (IR) of material were recorded by using Thermo scientific Nicolet 6700. The use of the spectral subtraction provided reliable and reproducible results.

**1.4 X-Ray Photoelectron Spectroscopy (XPS)** Thin film of perovskites has been studied on XPS with model no. PHI 5000 VersaProbe III for urface analysis.

**1.5 Transmission Electron Microscopy (TEM)** TEM study was carried out by TEM TECHNAI G2 20 S-TWIN. A drop (5-10 $\mu$ L) of diluted samples was placed on Carbon coated Copper grid. Again a drop was added before drying it. Afterwards drying was carried at ambient temperature.

**1.6 Powder XRD** was carried out on Bruker -D8 Advance having Target Cu and accelerating voltage 40kV from 5 to 50° at the rate of 2°/min. Thin film samples were prepared on silica glass.

**1.7 FE-SEM (Carl Zeiss)** has been formed to know about the surface morphology of thin film of perovskite on glass slide at 20 kV.

S1

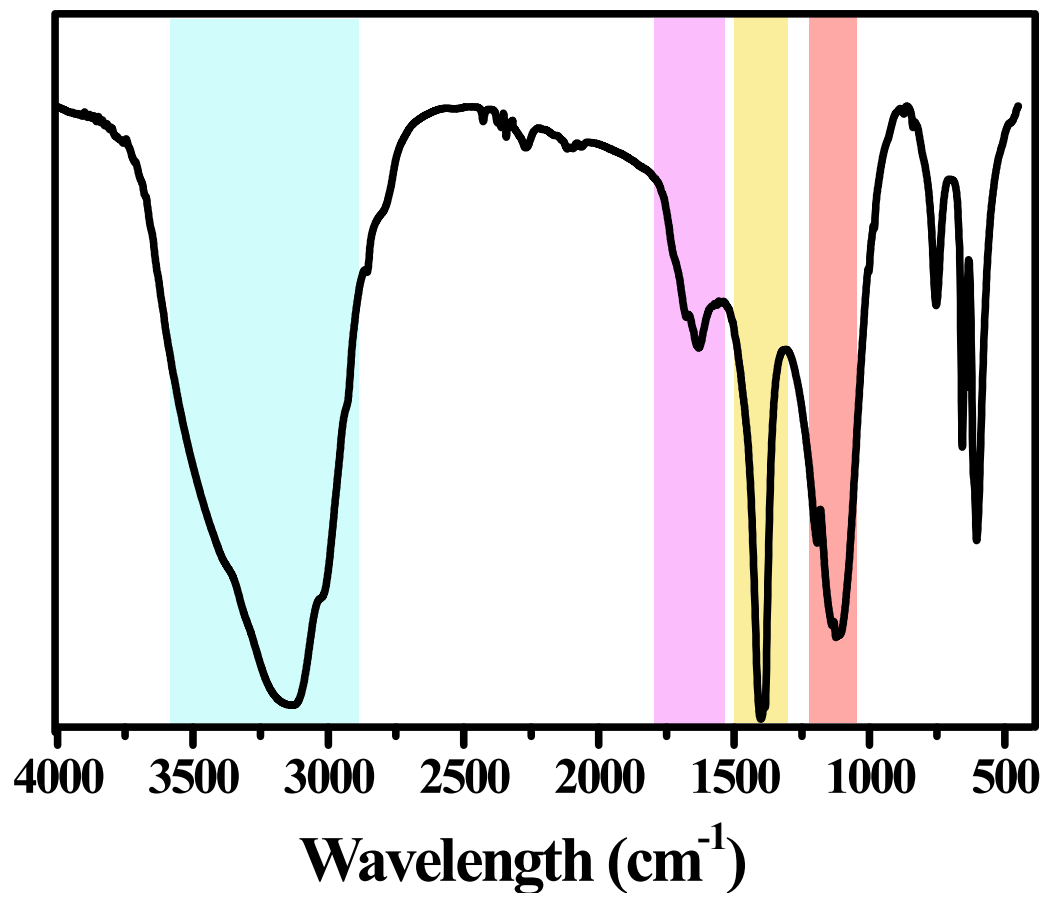

Figure S1. FT-IR spectra of MAPbBr<sub>3</sub> solution

**Table S1 summarizes solved Powder XRD pattern for MAPbBr<sub>3</sub> Perovskite solution**

| <b>2<math>\Theta</math></b> | <b><math>\Theta</math></b> | <b>sin<math>\Theta</math></b> | <b>2sin<math>\Theta</math></b> | <b>Sin<sup>2</sup><math>\Theta</math></b> | <b>Ratio</b> | <b>d</b> | <b>(hkl)</b> |
|-----------------------------|----------------------------|-------------------------------|--------------------------------|-------------------------------------------|--------------|----------|--------------|
| 14.97                       | 7.49                       | 0.130                         | 0.261                          | 0.017                                     | 1            | 5.93     | (100)        |
| 21.16                       | 10.58                      | 0.183                         | 0.367                          | 0.034                                     | 1.99         | 4.19     | (110)        |
| 26.94                       | 13.47                      | 0.232                         | 0.464                          | 0.054                                     | 3.08         | 3.32     | (111)        |
| 30.17                       | 15.08                      | 0.260                         | 0.520                          | 0.068                                     | 4            | 2.96     | (200)        |
| 34.07                       | 17.03                      | 0.292                         | 0.584                          | 0.085                                     | 5.04         | 2.63     | (210)        |
| 37.16                       | 18.58                      | 0.318                         | 0.636                          | 0.101                                     | 5.99         | 2.42     | (211)        |
| 43.09                       | 21.55                      | 0.367                         | 0.734                          | 0.135                                     | 7.97         | 2.09     | (220)        |
| 45.91                       | 22.96                      | 0.390                         | 0.780                          | 0.152                                     | 9            | 1.97     | (300)        |

S2

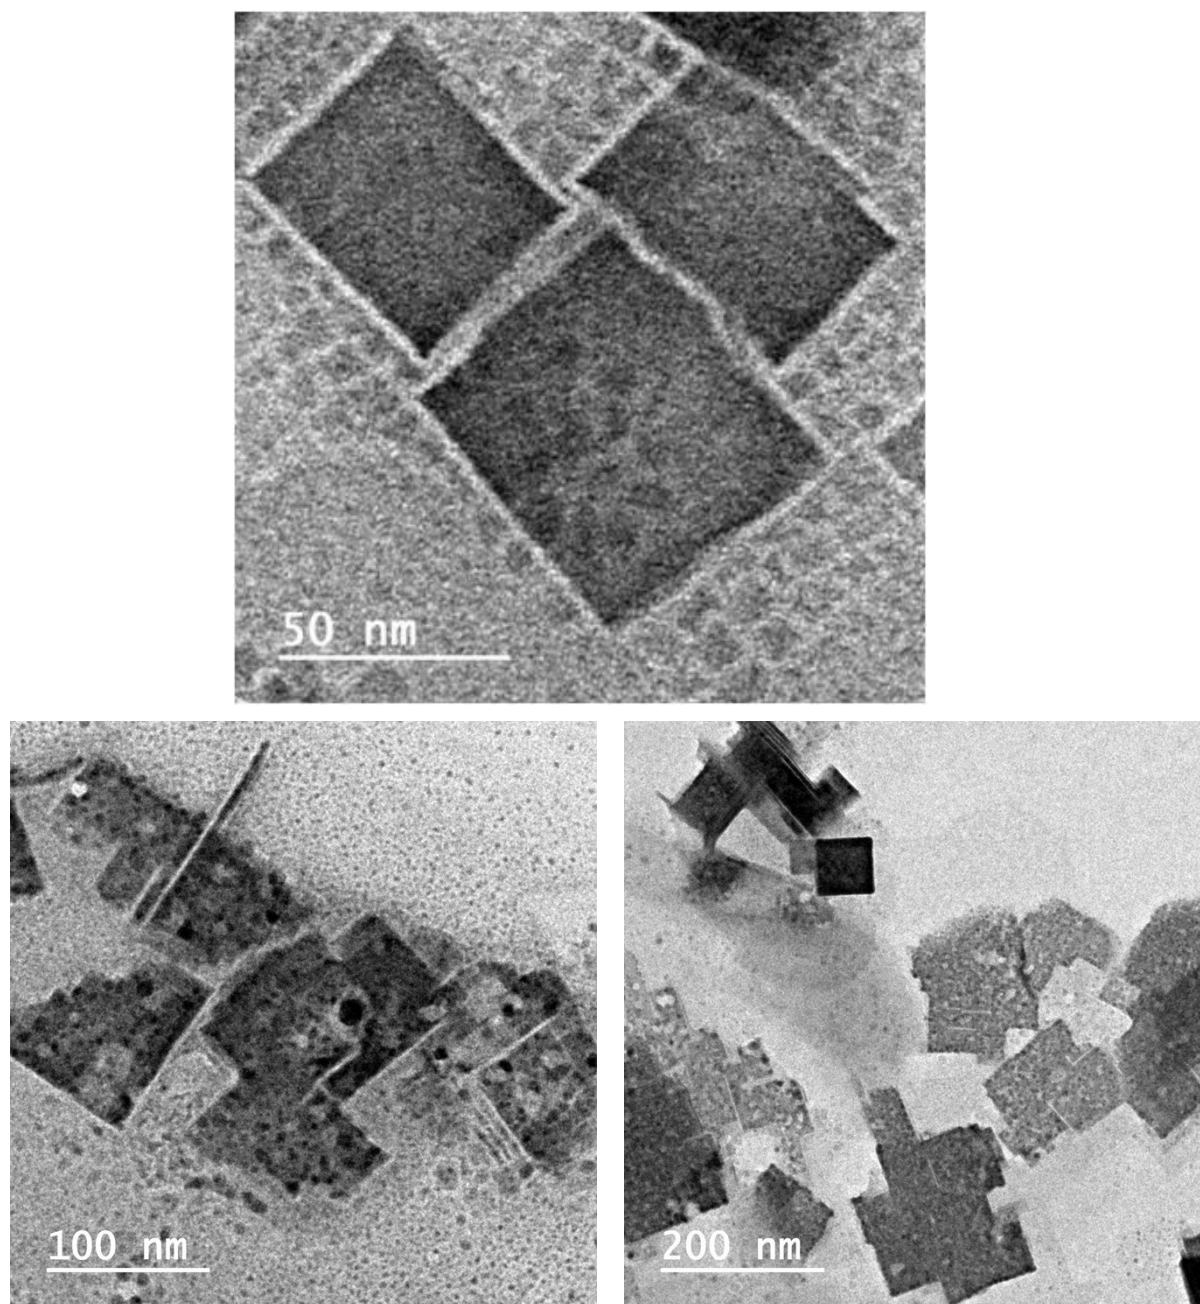

**Figure S2 shows TEM images in different scales at 200kV**

**S3**

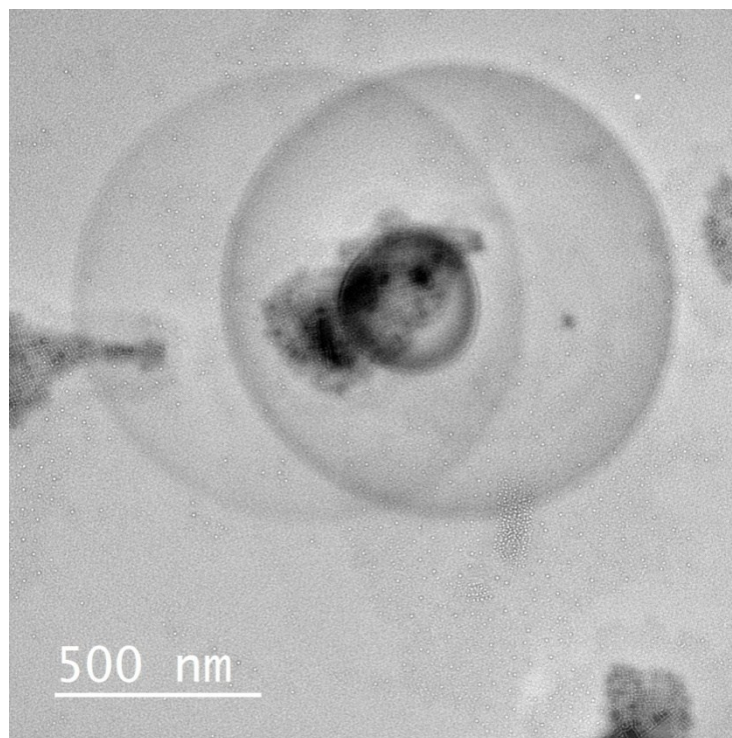

**Figure S3 Degraded TEM image after 25 minutes**

S4

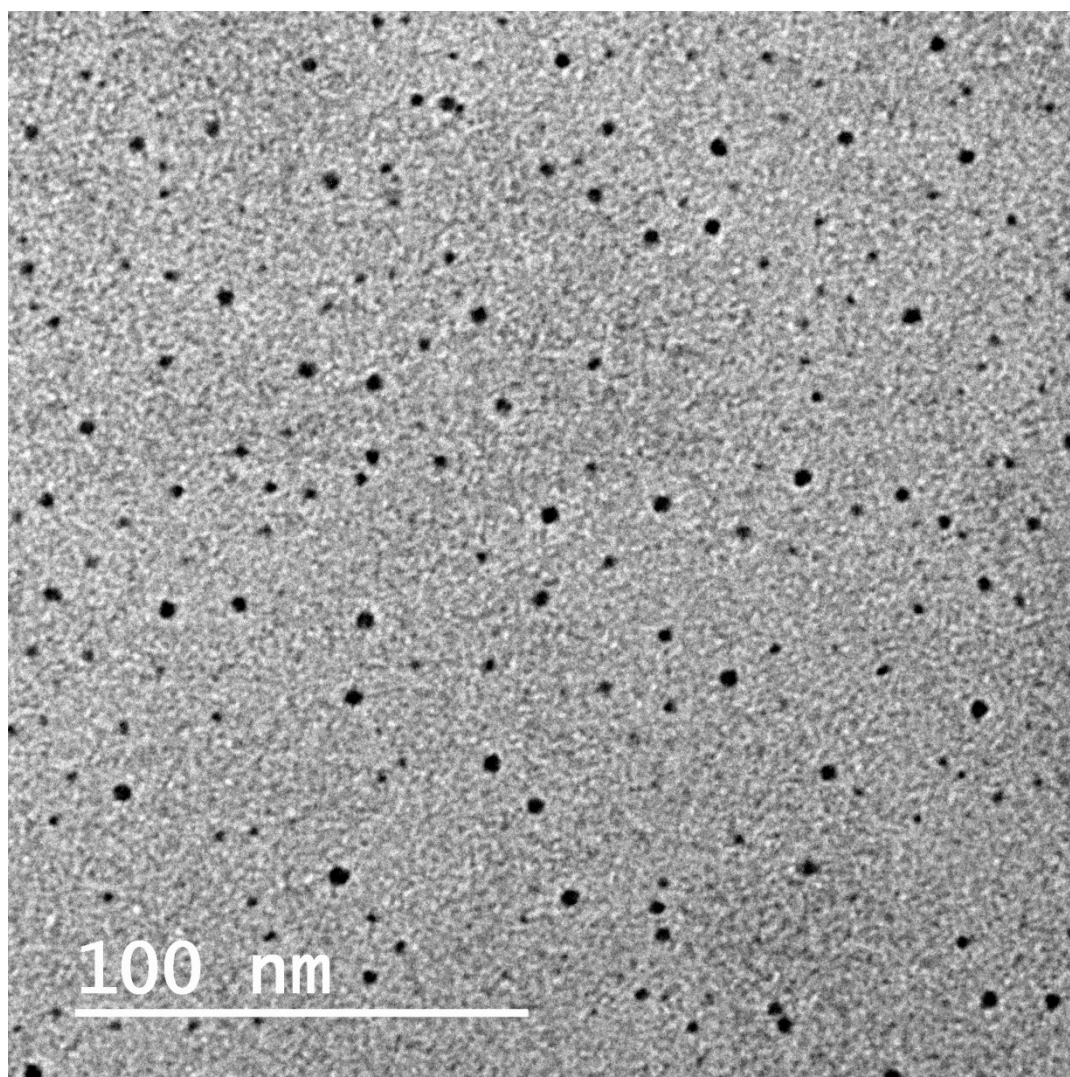

**Figure S4 shows TEM image of MAPbBr<sub>3</sub> using Oleic and oleylamine (100/200 $\mu$ l) in CHCl<sub>3</sub>**

S5

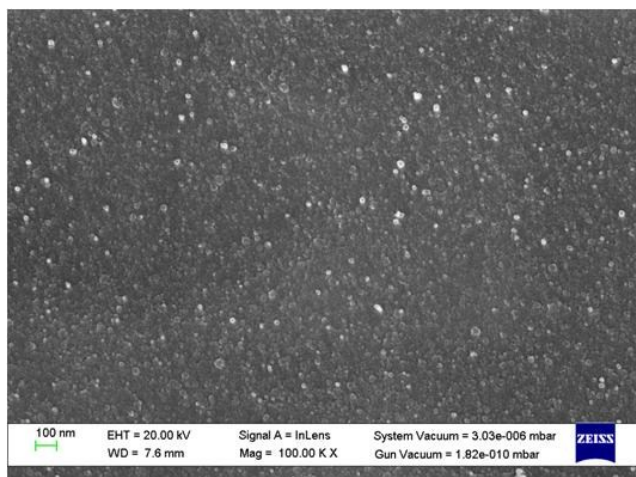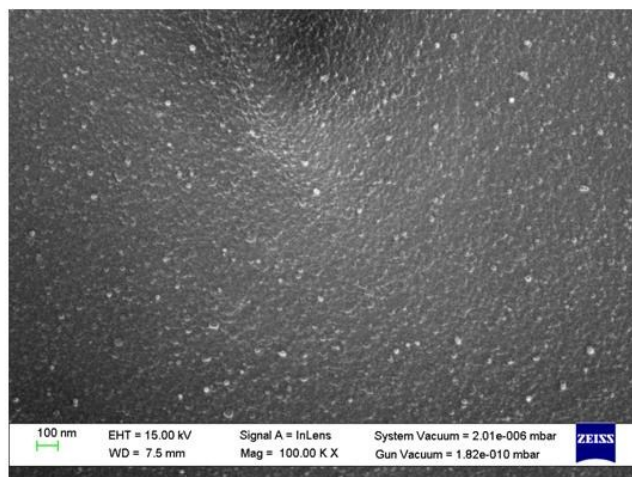

**Figure S5 FE SEM (Carl Zeiss) images for MAPbBr<sub>3</sub> solution (using succinic acid) in CHCl<sub>3</sub> and Toluene**

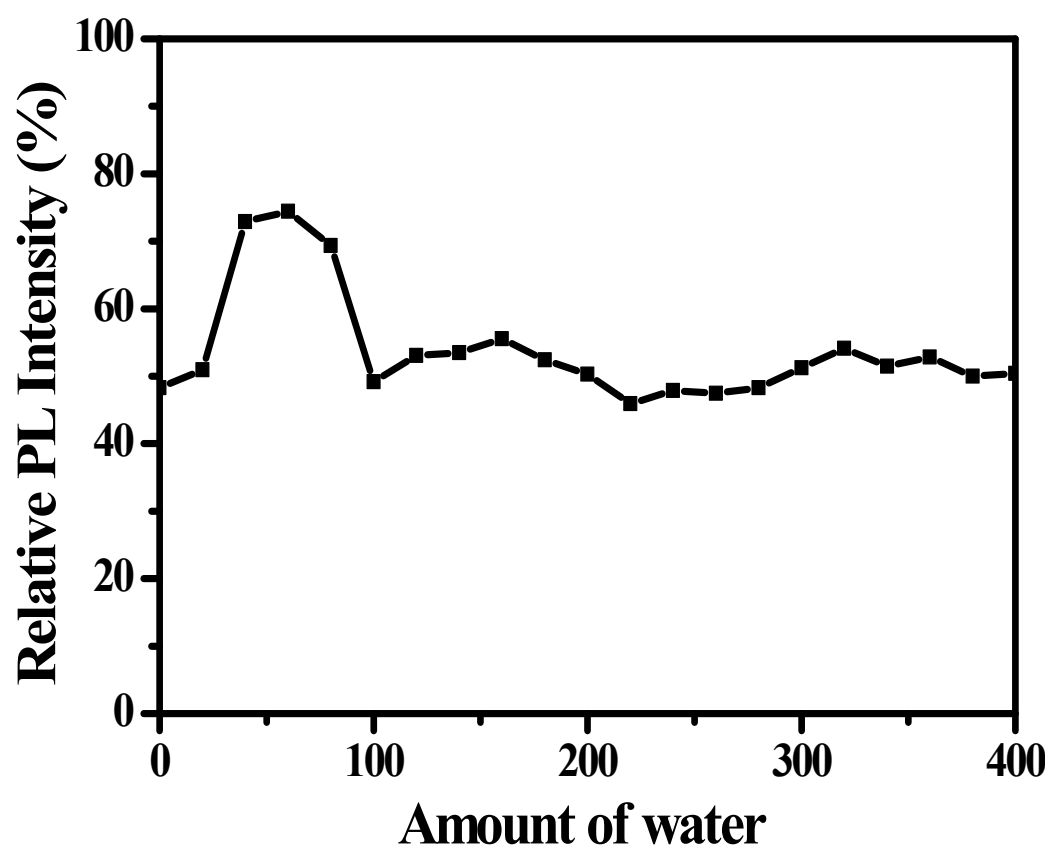

Figure S6 Relative PL intensity versus amount of water.

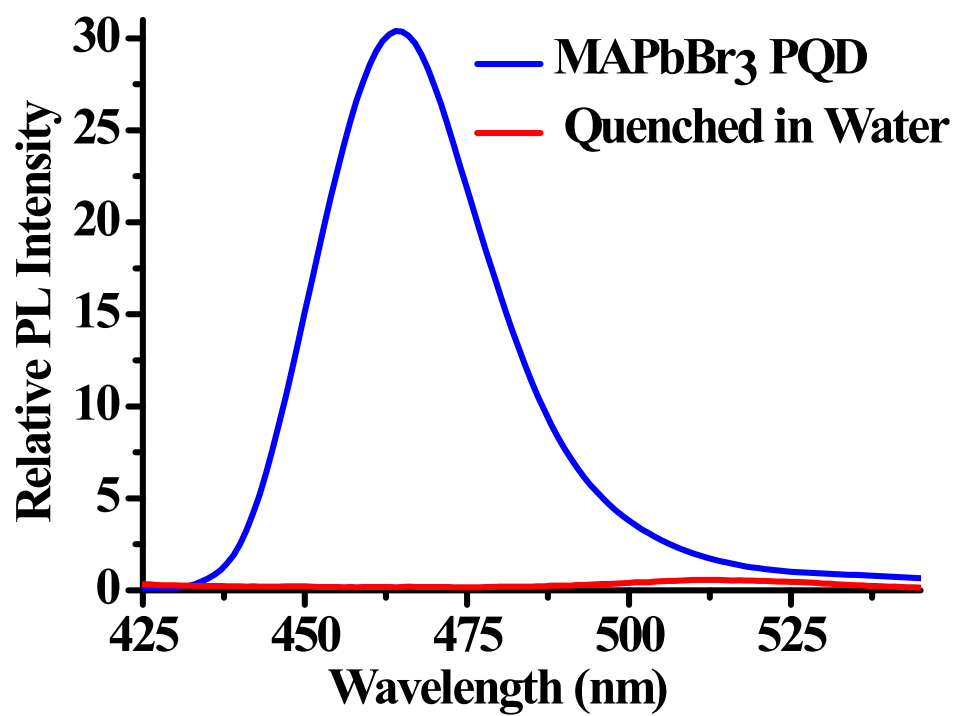

**Figure S7 Quenching of MAPbBr<sub>3</sub> solution (synthesized using oleic acid )in small amount of water**

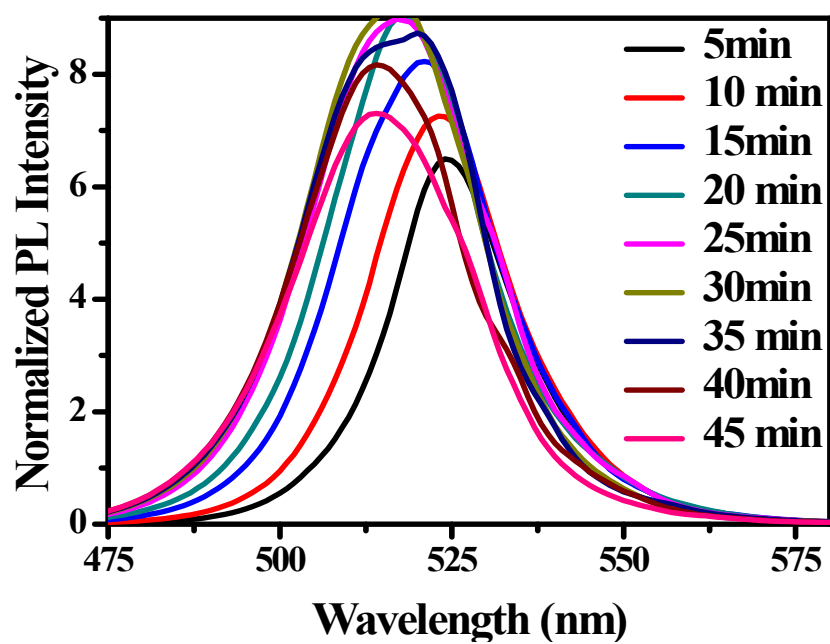

Figure S8 shows shifted time dependent PL studies of perovskite solution in the presence of 400  $\mu\text{L}$  of water

S9

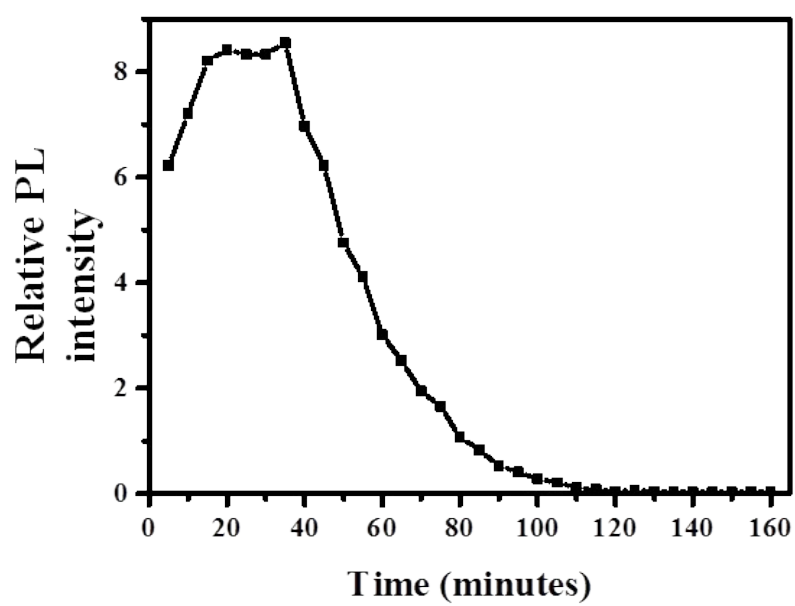

**Figure S9 shows decreasing relative PL intensity and degradation of perovskite solution in 150 minutes in the presence of water**

S10

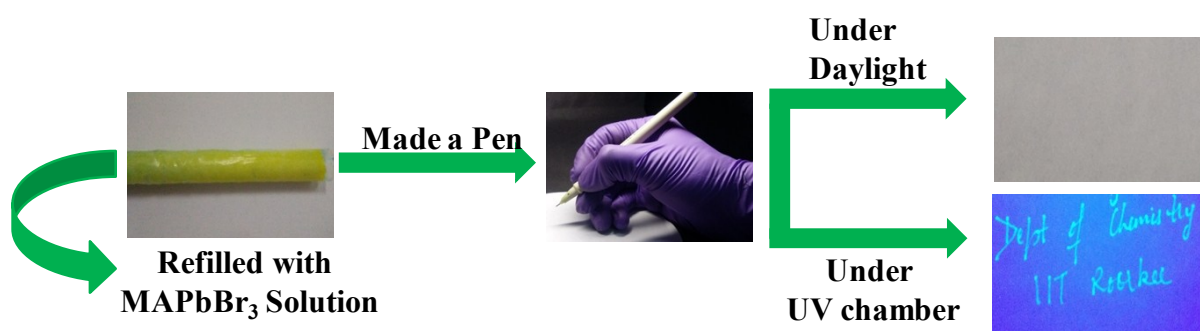

Figure S10 refilling of pen and application as fluorescent ink
